# Supplementary material for: Methanol-to-hydrocarbon initiation reactions over a zeolite catalyst: reactive molecular dynamics simulations
Source: Royal Society of Chemistry journal article supplement (doi:10.1039/d5cp02704g), 2025-01-01
Supplement: d5cp02704g1.pdf [file d5cp02704g1.pdf]

## Supplementary Information

### Methanol-to-Hydrocarbon Initiation Reactions over a Zeolite Catalyst: Reactive Molecular Dynamics Simulations

E. Grajales-González<sup>a,c,\*1</sup>, Adri C. T. van Duin<sup>b,\*2</sup>, S. Mani Sarathy<sup>a</sup>

<sup>a</sup> Clean Energy Research Platform, Physical Sciences and Engineering (PSE) Division, King Abdullah University of Science and Technology (KAUST), Thuwal 23955-6900, Saudi Arabia

<sup>b</sup> Pennsylvania State University (PSU), PA, 16802, USA, Department of Mechanical Engineering

<sup>c</sup>Present address: Energy and Particle Technology Laboratory, Department of Mechanical and Aerospace Engineering, Carleton University, 1125 Colonel by Drive, Ottawa, ON, Canada, K1S 5B6

\*<sup>1</sup>Corresponding author: edwing.grajalesgonzalez@kaust.edu.sa

\*<sup>2</sup>Corresponding author: acv13@psu.edu

### Force Field Errors in the Estimation of Zeolite Framework Parameters

**Table S1.** Percentage errors of lattice parameters determined using the force field developed in this work. Reference values are from the International Zeolite Association database [1].

| Framework | % Error  |          |          |                |               |                |
|-----------|----------|----------|----------|----------------|---------------|----------------|
|           | Length a | Length b | Length c | Angle $\alpha$ | Angle $\beta$ | Angle $\gamma$ |
| FER       | 2.36     | 2.36     | 2.36     | 0.00           | 0.00          | 0.00           |
| IFR       | 0.16     | 0.16     | 2.36     | 0.00           | 0.00          | 0.00           |
| MFI       | 1.90     | 1.90     | 1.91     | 0.00           | 0.00          | 0.00           |
| TON       | 0.52     | 0.52     | 0.52     | 0.00           | 0.00          | 0.00           |

### Water-assisted Proton Transfer

a) Reactant

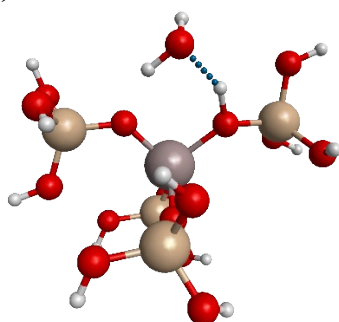

b) Transition state

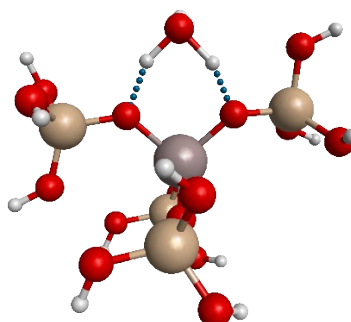

c) product

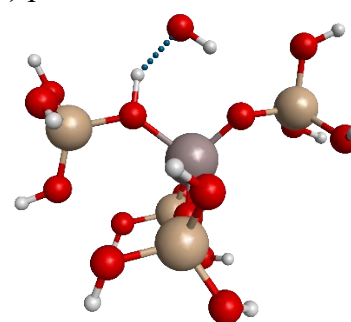

**Figure S1.** Water-assisted proton transport in the first coordination sphere of an aluminum atom. This reaction was found significant in the reactive simulation of the initiation reactions of the methanol-to-hydrocarbon process, and the force field well reproduced the potential energy barrier

(7.63 kcal·mol<sup>-1</sup>) estimated using density functional theory (7.28 kcal·mol<sup>-1</sup>) at the  $\omega$ B97X-D/6-311G(d,p) level, as shown in Figure S2. This system is built upon the works of Ryder et al. [2] and Joshi et al. [3]. White, red, brown, and dark pink spheres represent hydrogen, oxygen, silicon, and aluminum atoms, respectively.

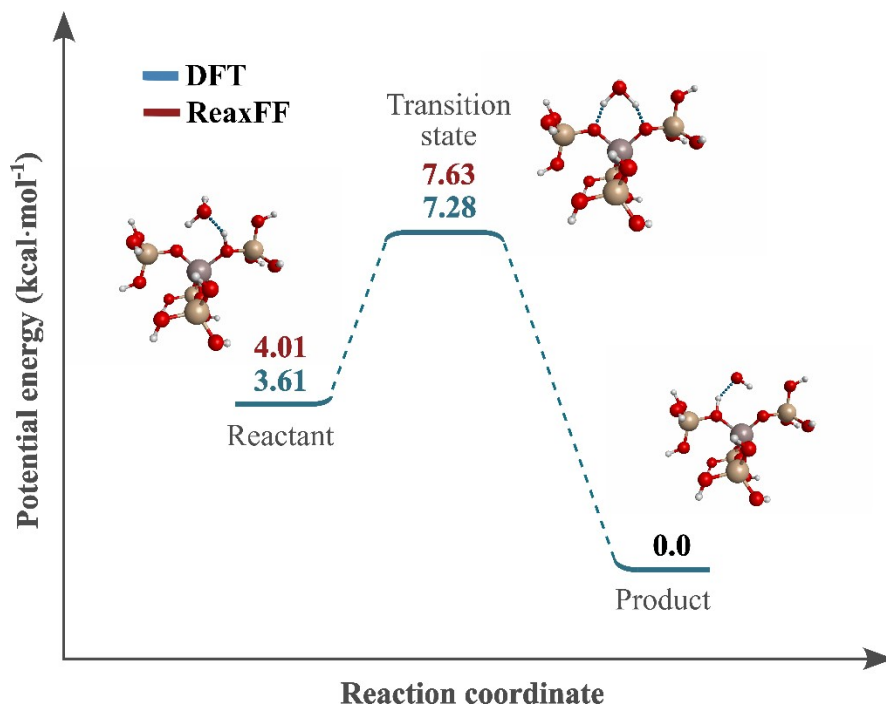

**Figure S2.** Density functional theory (DFT) and ReaxFF potential energy diagram of the water-mediated proton transport as a function of the forming ZO-H bond length. The transition state energy is 7.28 and 7.63 kcal·mol<sup>-1</sup> for DFT and ReaxFF, respectively. The asymmetry of the reaction pathway is attributed to the differences of the binding energies in the reactant and product [3].

### Effect of Water Loads at 1000 K

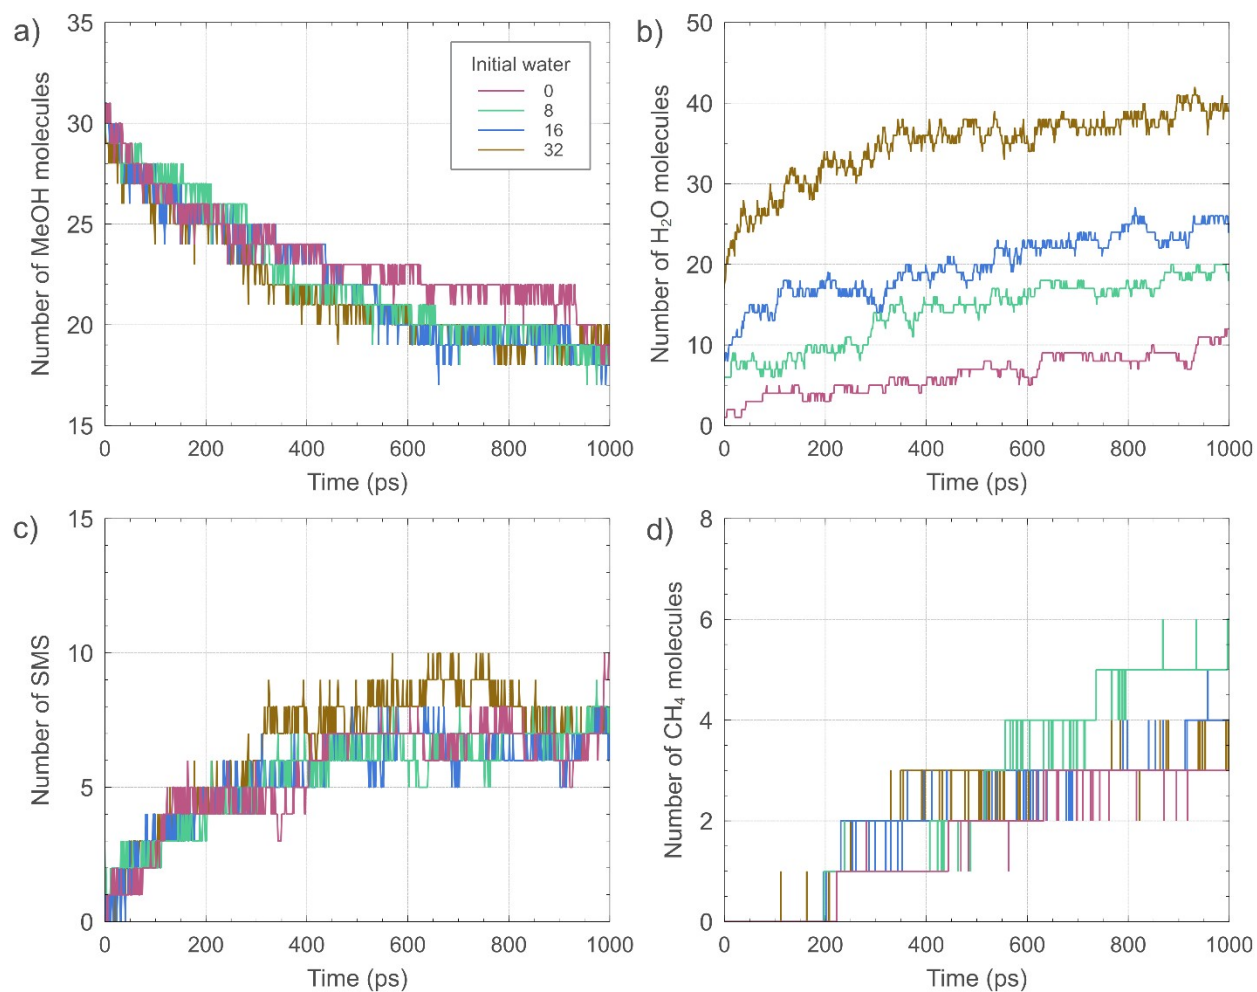

**Figure S3.** Number profiles of (a) methanol, (b) water, (c) surface methoxy species (SMS), and (d) methane as a function of time of simulations conducted at 1000 K and the initial water loads of 0, 8, 16, and 32.

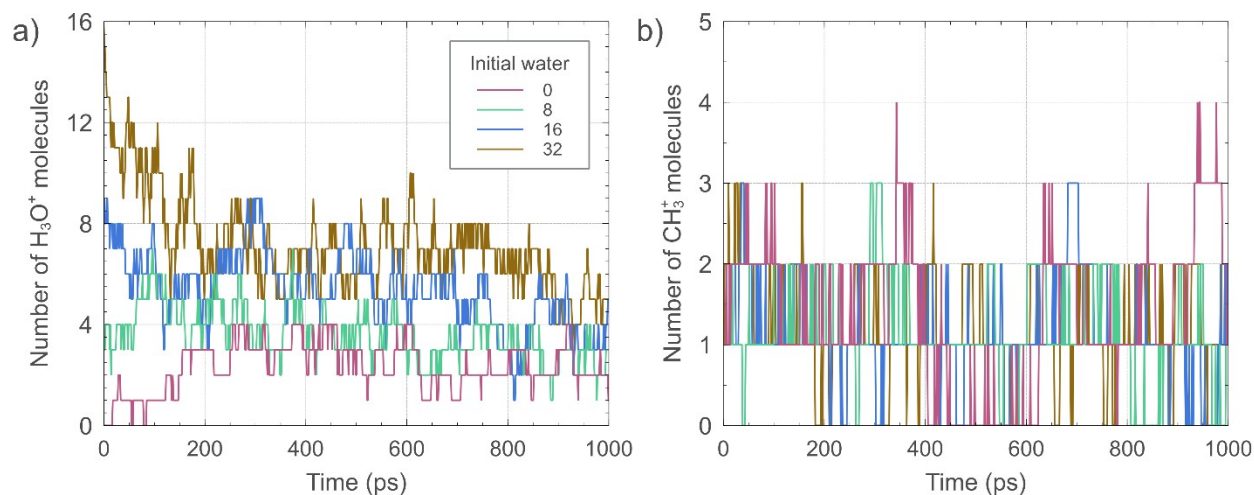

**Figure S4.** Number profiles of the (a) hydronium ions and (b) methyl cations species as a function of time of simulations conducted at 1000 K and the initial water loads of 0, 8, 16, and 32.

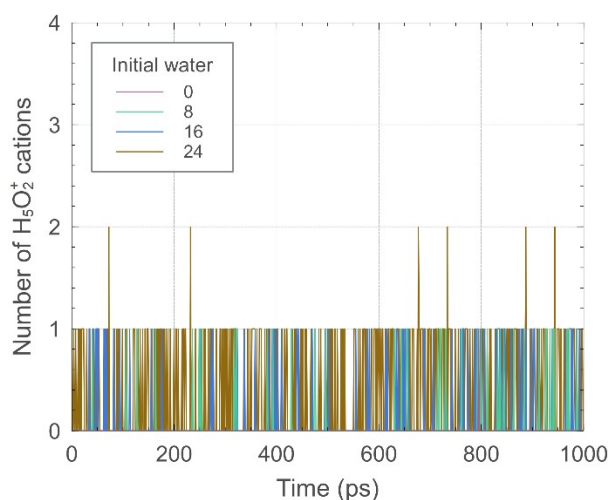

**Figure S5.** Number profiles of the Zundel cation as a function of time of simulations conducted at 800 K and the initial water loads of 0, 8, 16, and 32.

## References

- [1] Structure Commission of the International Zeolite Association, Database of Zeolite Structures, 2022.
- [2] J.A. Ryder, A.K. Chakraborty, A.T. Bell, Density Functional Theory Study of Proton Mobility in Zeolites: Proton Migration and Hydrogen Exchange in ZSM-5, *J. Phys. Chem. B* 104 (30) (2000) 6998–7011.
- [3] K.L. Joshi, G. Psfogiannakis, A.C.T. van Duin, S. Raman, Reactive molecular simulations of protonation of water clusters and depletion of acidity in H-ZSM-5 zeolite, *Phys. Chem. Chem. Phys.* 16 (34) (2014) 18433–41.
